1 **Elevated CO<sub>2</sub> and warming change the nutrient status**  
2 **and use efficiency of *Panicum maximum* Jacq.**

3 Juliana Mariano Carvalho<sup>1</sup>, Renato de Mello Prado<sup>1</sup>, Rafael Ferreira Barreto<sup>1\*</sup>, Eduardo  
4 Habermann<sup>2</sup>, Roberto Botelho Ferraz Branco<sup>3</sup>, Carlos Alberto Martinez<sup>2</sup>

5 <sup>1</sup>Department of Soils and Fertilizers, São Paulo State University (UNESP), School of  
6 Agricultural and Veterinarian Sciences, São Paulo, Jaboticabal, Brazil.

7 <sup>2</sup>Department of Biology, FFCLRP, São Paulo University (USP), São Paulo, Ribeirão  
8 Preto, Brazil.

9 <sup>3</sup>São Paulo Agribusiness Technology Agency (APTA), Ribeirão Preto, São Paulo, Brazil.

10 \*Corresponding author: [rafael.fb@outlook.com](mailto:rafael.fb@outlook.com)

11 **Short title:** Warming and [CO<sub>2</sub>] on nutritional composition of *Panicum maximum* Jacq.

12

## 13 **Abstract**

14 *Panicum maximum* Jacq. ‘Mombaça’ (guinea grass) is a C<sub>4</sub> forage grass widely used in  
15 tropical pastures for cattle feeding. In this study, we evaluated the isolated and combined  
16 effects of warming and elevated CO<sub>2</sub> concentration [CO<sub>2</sub>] during summer on the nutrient  
17 content, nutrient accumulation, nutrient use efficiency and growth of *P. maximum* under  
18 field conditions with adequate water supply. The temperature and [CO<sub>2</sub>] in the field were  
19 controlled by temperature free-air controlled enhancement and free-air CO<sub>2</sub> enrichment  
20 systems, respectively. We tested two levels of canopy temperature: ambient temperature  
21 and 2°C above ambient temperature, as well as two levels of atmospheric [CO<sub>2</sub>]: ambient  
22 [CO<sub>2</sub>] (aCO<sub>2</sub>) and 200 ppm above ambient CO<sub>2</sub> (eCO<sub>2</sub>). The experiment was established  
23 in a completely randomised design with four replications, in a 2×2 factorial scheme. After  
24 the pasture establishment, plants were exposed to the treatments for 30 days, with  
25 evaluations at 9, 16, 23 and 30 days after the treatments started. Results were dependent  
26 on the time of the evaluation, but in the last evaluation (beginning of the grazing), contents  
27 of N, K, Mg and S did not change as a function of treatments, P decreased as a function  
28 of warming, in [aCO<sub>2</sub>] and [eCO<sub>2</sub>], and Ca increased under [eCO<sub>2</sub>] combined with  
29 warming. There was an increase in root dry mass under warming treatment. Combined  
30 treatment increased N, Ca and S accumulation without a corresponding increase in the  
31 use efficiency of these same nutrients, indicating that the fertiliser dose should increase  
32 in the next decades due to human-induced climate change. Our short-term results suggest  
33 that the combination of high [CO<sub>2</sub>] and temperature will increase *P. maximum*  
34 productivity and that the nutritional requirement for N, Ca and S will increase.

35

## 36 **Introduction**

37

38 During the last decades, anthropic emissions of greenhouse gases, such as carbon dioxide  
39 ( $\text{CO}_2$ ), nitrous oxide ( $\text{N}_2\text{O}$ ) and methane ( $\text{CH}_4$ ), have induced alterations in the natural  
40 climate cycles of the Earth, elevating the mean surface temperature of the planet [1,2].  
41 The global temperature has been increasing in the last years, and several climate models  
42 estimate that this trend will continue in the next decades [3]. Many climate change  
43 scenarios have been proposed, depending on the future emissions of greenhouse gases  
44 and mitigation policies. According to a moderate-impact scenario outlined by the  
45 Intergovernmental Panel on Climate Change (IPCC), the atmospheric  $\text{CO}_2$  concentration  
46 ( $[\text{CO}_2]$ ) will reach 600 ppm by 2100, while the global surface temperature will be between  
47 2.0 and 3.7°C above the pre-industrial average temperature [3].

48 In tropical and sub-tropical regions, livestock is one of the most important  
49 economic activities, and pastures cover extensive areas of the territory, being the main  
50 source for cattle feeding in most of these regions [4]. The effects of climate change on  
51 the nutritional composition of tropical forage plants deserves attention because climate  
52 change factors might alter nutrient uptake and nutrient use efficiency (NUE) by plants,  
53 affecting pasture productivity, forage quality and livestock [5].

54 The responses of tropical plants to elevated  $[\text{CO}_2]$  are poorly understood when  
55 compared with species grown in temperate and sub-tropical regions, especially  $\text{C}_4$   
56 species. However, some general responses may be highlighted. For example, increased  
57  $[\text{CO}_2]$  decreases transpiration rates and increases photosynthesis in many species, thereby  
58 greatly increasing water use efficiency [6]. The fact that transpiration governs the root–  
59 ion contact of N, Ca, Mg and S [7] suggests that at high  $[\text{CO}_2]$ , less absorption of these  
60 nutrients may occur. Accordingly, it was shown that elevated  $[\text{CO}_2]$  led to decreased  
61 transpiration and less uptake of N, K, Ca, Mg and S in wheat plants, although the  
62 differences were dependent on the time of evaluation. In addition, as the amount of

63 nutrients absorbed per unit of transpired water increased with elevated [CO<sub>2</sub>], the authors  
64 indicated that high [CO<sub>2</sub>] is not the only factor responsible for decreased nutrient uptake  
65 [8]. However, increased photosynthesis suggests that more nutrients are needed to sustain  
66 plant growth, or that NUE is increased. NUE refers to the ability of the plant to convert  
67 absorbed nutrient to dry matter [9]. In addition, high [CO<sub>2</sub>] may increase root  
68 development and modify the root foraging strategies in order to obtain more resources  
69 and sustain higher plant growth [10]. However, an increment of atmospheric [CO<sub>2</sub>] will  
70 be followed by an increase in temperature [3].

71 C<sub>4</sub> species are adapted to warm, as well as arid environments. Experiments suggest  
72 that *P. maximum* would benefit by a 2°C warming under well-watered conditions, by  
73 exhibiting increased dry mass [11] and not showing increased stress indicators, such as  
74 malondialdehyde and hydrogen peroxide [12]. However, under heating, there was no  
75 increase in photosynthesis and transpiration [6,13], suggesting that under a warmed  
76 atmosphere, *P. maximum* may exhibit increased NUE. It was also observed that under  
77 heating, *P. maximum* exhibited an increase in the concentration of many amino acids,  
78 such as valine, threonine and phenylalanine, which have N in their structure [14]. In  
79 addition, warming may stimulate nutrient uptake through increased root system growth,  
80 increased nutrient diffusion rates and water in-flow [15] but at the same time, gain in dry  
81 mass on heating may result in a leaf N dilution effect in *P. maximum* [11]. The same  
82 authors observed that the gain in leaf dry mass remains under conditions of combined  
83 warming and elevated [CO<sub>2</sub>], but leaf N content increases, suggesting that combined  
84 warming with elevated [CO<sub>2</sub>] results in lower N use efficiency. For other macronutrients,  
85 no published studies have evaluated the mineral composition and NUE of *P. maximum*  
86 under combined effects of elevated [CO<sub>2</sub>] and warming, to date.

87           Therefore, we exposed a field-grown pasture of guinea grass to elevated [CO<sub>2</sub>]  
88 and warming using a combination of temperature free-air controlled enhancement (T-  
89 FACE) and free-air CO<sub>2</sub> enrichment (FACE) systems in order to understand the nutrient  
90 dynamics under a short-term experiment. We hypothesise that elevated [CO<sub>2</sub>] may  
91 decrease nutrient content but increase nutrient accumulation and NUE, while warming  
92 could increase nutrient content and nutrient accumulation but decrease NUE, mainly due  
93 to the possible increase in biomass production. In addition, we hypothesised that *P.*  
94 *maximum* dry mass in the warming and elevated [CO<sub>2</sub>] combined treatment will have no  
95 difference relative to warming alone, but that nutrient content and accumulation will  
96 increase, and NUE will decrease.

97

## 98 **Material and methods**

99

### 100 **Study site and system**

101 The study was carried out at the Trop-T-FACE facility, located at the University of São  
102 Paulo (USP), Campus of Ribeirão Preto (São Paulo, Brazil), at 21°10'8" S and 47°51'48.2"  
103 W and 580 m altitude. The Trop-T-facility is composed of the T-FACE and the FACE  
104 systems. According to Thornthwaite [16], the climate at the facility is classified as  
105 B2rB'4a', moist mesothermal with a small water deficiency. The soil was classified as  
106 dystrophic red Latosol [17].

107           Two months before sowing, we collected 10 soil samples (20 cm deep) at the  
108 experimental area and analysed it for fertility [18], obtaining the following results (Table  
109 1).

110

111 **Table 1.** Soil chemical analysis (0 to 20 cm depth) at Trop-T-FACE facility.

| pH                | OM                 | K     | Ca                                 | Mg    | H Al  | P     | B     | Cu                  | Fe    | Mn    | Zn    |
|-------------------|--------------------|-------|------------------------------------|-------|-------|-------|-------|---------------------|-------|-------|-------|
| CaCl <sub>2</sub> | g dm <sup>-3</sup> | ----- | mmol <sub>c</sub> dm <sup>-3</sup> | ----- | ----- | ----- | ----- | mg dm <sup>-3</sup> | ----- | ----- | ----- |
| 5.2               | 23                 | 1.7   | 32.8                               | 8.5   | 32    | 58    | 0.3   | 3.6                 | 12.3  | 16.1  | 1.7   |

112

113 Soil preparation consisted of the soil rotation and the application of calcined  
 114 limestone (48% CaO and 16% MgO) to correct for soil acidity (increasing soil pH to 5.5),  
 115 using a cultivator 2 months before seeding. Soil fertilisation was conducted [19] through  
 116 the mechanical incorporation of the fertilisers to 0.10 m depth. The following sources  
 117 were used: simple superphosphate (18% P<sub>2</sub>O<sub>5</sub>), potassium chloride (60% K<sub>2</sub>O), zinc  
 118 sulphate (22% Zn), boric acid (17% B) and sodium molybdate (39% Mo). During the  
 119 experimental period, the accumulated rainfall was 224 mm, and the average temperature  
 120 was 25 °C, with minimum and maximum of 16 and 35 °C, respectively, while the average  
 121 air relative humidity was 87% [6].

122

## 123 **Description of treatments and planting method**

124 We tested two canopy temperatures: ambient temperature (aT) and 2°C above ambient  
 125 temperature (eT) and two atmospheric [CO<sub>2</sub>]: ambient [CO<sub>2</sub>] (aCO<sub>2</sub>) and 200 ppm above  
 126 aCO<sub>2</sub> (eCO<sub>2</sub>). The experiment was set up in a completely randomised design, with four  
 127 replications in a 2×2 factorial scheme. Treatment combinations were designated as  
 128 follows: aTaCO<sub>2</sub> (ambient temperature and ambient [CO<sub>2</sub>]), eTaCO<sub>2</sub> (elevated  
 129 temperature and ambient [CO<sub>2</sub>]), aTeCO<sub>2</sub> (ambient temperature and elevated [CO<sub>2</sub>]) and  
 130 eTeCO<sub>2</sub> (elevated temperature and elevated [CO<sub>2</sub>]). Seeds of *P. maximum* cv. Mombaça  
 131 were sown manually in 16 plots (10 m × 10 m), with a final planting density of 16 plant  
 132 m<sup>-2</sup> [20]. During seedling growth, supplemental irrigation was performed when  
 133 necessary. After the pasture establishment, when plants reached 90 cm in height, a  
 134 standardisation cut was performed at 30 cm above the ground, as part of the post-grazing

135 management. Then, plants were exposed to the treatments for 30 days. In rotational  
136 grazing practices, 30 days is the normal plant re-growth time that is often used for this  
137 species [21]. Studies indicated that the maximum browsing efficacy of *P. maximum* cv.  
138 Mombaça and the highest leaf dry mass production are achieved with 30 cm post-grazing  
139 pasture height and 90 cm pre-grazing targets, respectively [22]. In tropical zones, guinea  
140 grass is often cultivated under rain-fed conditions, so we decided not to irrigate the plants  
141 after the pasture establishment.

142 Treatments were applied inside circular plots consisting of a 2-m-diameter ring  
143 (equivalent to 3.14 m<sup>2</sup>), placed in each 10 m × 10 m plot. We used a safety distance of 12  
144 m between experimental plots to avoid CO<sub>2</sub> cross-contamination.

145

## 146 **Trop-T-FACE facility description**

147 The eCO<sub>2</sub> treatment was applied using a FACE system [23]. In each eCO<sub>2</sub> and eCO<sub>2</sub> +  
148 eT plot, a PVC ring with micro-apertures was used to fumigate pure CO<sub>2</sub> into the plant  
149 canopy. A control unit regulated the amount of CO<sub>2</sub> required in eCO<sub>2</sub> and eCO<sub>2</sub> + eT plots  
150 to increase [CO<sub>2</sub>] 200 ppm above the level in the plots with [aCO<sub>2</sub>]. The [CO<sub>2</sub>] in each  
151 plot was monitored by a portable [CO<sub>2</sub>] sensor model GTM220 (Vaisala, Finland) located  
152 in the centre of each plot, at canopy height. To regulate the opening of the solenoid valves,  
153 the central control unit used a proportional integral derivative (PDI). CO<sub>2</sub> was stored in  
154 liquid form in a 12-t cryogenic tank and vaporised before being sent for distribution to  
155 the FACE control unit. CO<sub>2</sub> supply to achieve high-CO<sub>2</sub> levels was regulated through  
156 automatic electromagnetic regulators (ITV model, SMC Corporation, Japan) [23,24].  
157 CO<sub>2</sub> fumigation by the FACE system occurred daily, from sunrise to sunset.

158 The eT treatment was applied using a T-FACE system [25]. In each warmed plot,  
159 six infrared Salamander heaters (1000 W, 240 V; model FTE-1000, Mor Electric Heating,

160 Comstock Park, MI, USA) were used to warm the plant canopy to 2°C above the ambient  
161 canopy temperature. In each plot, we used an infrared radiometer model SI-1H1-L20  
162 (Apogee Instruments, UT, USA) to monitor the canopy temperature. Using temperature  
163 data of warmed and non-warmed plots, the central unit of the T-FACE was calculated,  
164 and the voltage of the resistors was adjusted in each heated plot to reach the set-point.  
165 Our set-point in this experiment was 2°C above the ambient canopy temperature.

166

## 167 **Plant growth**

168 At 9, 16, 23 and 30 days after treatment (DAT), plants were collected using the square  
169 method, with an area of 0.0625 m<sup>2</sup>, and cut with scissors at 0.30 m above ground. Plant  
170 material was washed in running water, neutral detergent (0.1%), HCl (0.3%) and  
171 deionised water, and then packed in paper bags and oven-dried at 60°C with forced air  
172 circulation until a constant mass was obtained.

173 To determine the root growth, at 30 DAT, we collected two samples per plot using  
174 a soil sampling probe (Sondaterra, Brazil) with an 11-cm internal diameter and volume  
175 of 1,900 cm<sup>3</sup>. Samples were collected at a soil depth of 0–0.20 and 0.20–0.40 m,  
176 respectively. Each sample was washed, and the roots were dried at 70°C for 72 h to  
177 determine the root dry mass.

178

## 179 **Nutrient composition**

180 The above-ground dry mass was milled in a Willey-type mill. N was determined from the  
181 digestion of samples in H<sub>2</sub>SO<sub>4</sub>, distillation with the Kjeldahl distiller and titration in  
182 H<sub>2</sub>SO<sub>4</sub> solution [26]. From the digestion of the samples in HNO<sub>3</sub> and perchloric acid  
183 solution, P was determined in a spectrophotometer from the phosphovanadomolybdic  
184 complex formed in the reaction of P with the solution of molybdovanadate, while K, Ca



185 and Mg were determined by atomic absorption spectrophotometry, and S was measured  
186 by turbidimetric determination of the barium sulphate suspension after the addition of  
187 barium chloride [26]. We calculated the shoot nutrient accumulation (NA) based on the  
188 shoot nutrient content and the shoot dry mass:

189

$$190 \quad \text{NA (kg ha}^{-1}\text{)} = \frac{\text{Shoot nutrient content, g kg}^{-1} \times \text{shoot dry mass, kg ha}^{-1}}{1000} \quad (1)$$

191

192 The NUE was calculated according to Siddiqi and Glass [9], expressed as follows:

193

$$194 \quad \text{NUE (Mg ha}^{-1}\text{)} = \frac{(\text{shoot dry mass, Mg ha}^{-1})^2}{\text{nutrient accumulation in shoot dry mass, Mg ha}^{-1}} \quad (2)$$

195

## 196 **Statistical analysis**

197 The data normality was checked by the Shapiro–Wilk test. We used a factorial two-way  
198 analysis of variance (ANOVA) to test the main effects of [CO<sub>2</sub>] and temperature, as well  
199 as their interaction when factors were combined. Non-significant means were compared  
200 by the F test. Means of significant interactive effects were compared using Tukey’s test  
201 ( $p \leq 0.05$ ). Analyses were performed using Sisvar software [27]. Trends between nutrient  
202 content and shoot dry mass were tested using regression analysis performed in GraphPad  
203 Prism software.

204

## 205 **Results**

## 206 **Macronutrient content**

207 *Panicum maximum* shoot N content was not affected by treatments, except at 16 DAT  
208 when plants grown under eT, independently of [CO<sub>2</sub>] level, showed decreased N content  
209 (Fig 1A, S1). Differences in P content were observed only in the last sampling (30 DAT)  
210 when plants grown under eT, regardless of [CO<sub>2</sub>], showed lower P contents (Fig 1B, S1).  
211 In general, plants grown under eTaCO<sub>2</sub> had lower K content, although [eCO<sub>2</sub>] mitigated  
212 this reduction in some samplings (Fig 1C, S1). Differences in Ca content were observed  
213 only in the last two evaluations; at 23 DAT, warming, regardless of [CO<sub>2</sub>], resulted in  
214 higher Ca content, and at 30 DAT, there was an interaction, so the eTeCO<sub>2</sub> treatment  
215 resulted in higher Ca content than the other treatments (Fig 1D, S1). Mg content increased  
216 at 9 DAT under eCO<sub>2</sub>aT treatment (Fig 1E, S1). The S content was not altered by the  
217 treatments (Fig 1F, S1).

218

219 **Fig 1.** N (A), P (B), K (C), Ca (D), Mg (E) and S (F) content of *P. maximum* shoot during  
220 the experiment at 9, 16, 23 and 30 days after treatments (DAT). Treatments: aTaCO<sub>2</sub>  
221 (ambient temperature and ambient [CO<sub>2</sub>]), eTaCO<sub>2</sub> (2°C above ambient temperature and  
222 ambient [CO<sub>2</sub>]), aTeCO<sub>2</sub> (ambient temperature and 200 ppm above ambient [CO<sub>2</sub>]), and  
223 eTeCO<sub>2</sub> (2°C above ambient temperature and 200 ppm above ambient [CO<sub>2</sub>]). Bars show  
224 means and SE of four replicates.

225

## 226 **Macronutrient accumulation**

227 At 16 DAS, [eCO<sub>2</sub>], regardless of temperature level, increased N accumulation; at 23  
228 DAT, eT and [eCO<sub>2</sub>] alone resulted in increased N. At 30 DAT, eT, regardless of [CO<sub>2</sub>]  
229 level increased N accumulation (Fig 2A, S1). At 9 DAT, eT, regardless of [CO<sub>2</sub>] level,  
230 increased P accumulation, while at 23 and 30 DAT, interactions between the factors

231 increased the P accumulation (Fig 2B, S1). At 16 and 23 DAT, K accumulation increased  
232 as a function of [eCO<sub>2</sub>], regardless of the temperature (Fig 2C, S1). At 23 and 30 DAT,  
233 Ca accumulation increased as a function of eT, regardless of [CO<sub>2</sub>] level (Fig 2D, S1). At  
234 9 DAT, the interactive effect indicated an increase of Mg accumulation in the eTaCO<sub>2</sub>  
235 treatment. At 16 DAT, plants grown under [eCO<sub>2</sub>] in both temperature conditions had  
236 higher Mg accumulation than the other plants. At 23 DAT, there was an interaction again,  
237 so that all treatments resulted in an increase of Mg accumulation relative to aTaCO<sub>2</sub>. At  
238 the last evaluation, that is, at 30 DAT, there was no effect of treatments on Mg  
239 accumulation (Fig 2E, S1). We observed an increase of S accumulation only at 30 DAT  
240 under eT plots, regardless of the [CO<sub>2</sub>] level (Fig 2F, S1).

241

242 **Fig 2.** N (A), P (B), K (C), Ca (D), Mg (E) and S (F) accumulation of *P. maximum* shoot  
243 during the experiment at 9, 16, 23 and 30 days after treatments (DAT). Treatments:  
244 aTaCO<sub>2</sub> (ambient temperature and ambient [CO<sub>2</sub>]), eTaCO<sub>2</sub> (2°C above ambient  
245 temperature and ambient [CO<sub>2</sub>]), aTeCO<sub>2</sub> (ambient temperature and 200 ppm above  
246 ambient [CO<sub>2</sub>]), and eTeCO<sub>2</sub> (2°C above ambient temperature and 200 ppm above  
247 ambient [CO<sub>2</sub>]). Bars show means and SE of four replicates.

248

## 249 **Macronutrient use efficiency**

250 In three of four evaluation days, eT increased the NUE of N, with [eCO<sub>2</sub>] partially  
251 mitigating this increase in the last sampling (Fig 3A, S1). At 23 and 30 DAT, NUE of P  
252 increased under eT, regardless of the [CO<sub>2</sub>] (Fig 3B, S1). We observed a noticeable  
253 tendency of increased NUE of K under eT plots, with [eCO<sub>2</sub>] amplifying this effect (Fig  
254 3C, S1). NUE of Ca increased at 16 DAT under eCO<sub>2</sub>, regardless of the temperature,  
255 while at 30 DAT, there was an interaction between treatments for NUE of Ca and Mg, so

256 that only plants grown under eT and [aCO<sub>2</sub>] had higher use efficiency of these nutrients  
257 (Fig 3D and 3E, S1). For NUE of S, we also observed a tendency of increase under eT,  
258 regardless of the [CO<sub>2</sub>] level (Fig 3F, S1).

259

260 **Fig 3.** N (A), P (B), K (C), Ca (D), Mg (E) and S (F) use efficiency of *P. maximum* shoot  
261 during the experiment at 9, 16, 23 and 30 days after treatments (DAT). Treatments:  
262 aTaCO<sub>2</sub> (ambient temperature and ambient [CO<sub>2</sub>]), eTaCO<sub>2</sub> (2°C above ambient  
263 temperature and ambient [CO<sub>2</sub>]), aTeCO<sub>2</sub> (ambient temperature and 200 ppm above  
264 ambient [CO<sub>2</sub>]), and eTeCO<sub>2</sub> (2°C above ambient temperature and 200 ppm above  
265 ambient [CO<sub>2</sub>]). Bars show means and SE of four replicates.

266

## 267 **Linear regressions between nutrient content and shoot dry**

### 268 **mass**

269 N content remained stable, as dry mass increased (Fig 4A). The contents of P, K and S  
270 decreased as a function of dry mass increase (Fig 4B, 4C and 4F), suggesting that for  
271 these nutrients, there was a dilution effect. Ca and Mg contents increased with increasing  
272 shoot dry mass (Fig 4D and 4E).

273

274 **Fig 4.** Linear regressions between N (A), P (B), K (C), Ca (D), Mg (E) and S (F) content  
275 and shoot dry mass of *P. maximum*. Treatments: aTaCO<sub>2</sub> (ambient temperature and  
276 ambient [CO<sub>2</sub>]), eTaCO<sub>2</sub> (2°C above ambient temperature and ambient [CO<sub>2</sub>]), aTeCO<sub>2</sub>  
277 (ambient temperature and 200 ppm above ambient [CO<sub>2</sub>]), and eTeCO<sub>2</sub> (2°C above  
278 ambient temperature and 200 ppm above ambient [CO<sub>2</sub>]).

279

## 280 **Dry mass**

281 The eT, in 9 days, in both [CO<sub>2</sub>], resulted in an increase in the shoot dry mass. However,  
282 at 16 DAT, plants grown under [eCO<sub>2</sub>] had increased dry mass; At 23 DAT, the [eCO<sub>2</sub>],  
283 combined or isolated from eT, resulted in an increase in the dry mass of the shoot. At 30  
284 DAT, the highest dry mass was observed only in plants grown under eT and [aCO<sub>2</sub>] (Fig  
285 5, S1). The root dry mass in the 0–20 and 20–40 cm layers were higher due to the increase  
286 in temperature (Fig 6A and 6B).

287

288 **Fig 5.** Shoot dry mass of *P. maximum* during the experiment at 9, 16, 23 and 30 days after  
289 treatments (DAT). Treatments: aTaCO<sub>2</sub> (ambient temperature and ambient [CO<sub>2</sub>]),  
290 eTaCO<sub>2</sub> (2°C above ambient temperature and ambient [CO<sub>2</sub>]), aTeCO<sub>2</sub> (ambient  
291 temperature and 200 ppm above ambient [CO<sub>2</sub>]), and eTeCO<sub>2</sub> (2°C above ambient  
292 temperature and 200 ppm above ambient [CO<sub>2</sub>]). Bars show means and SE of four  
293 replicates.

294

295 **Fig 6.** Root dry mass at 0-20 cm deep (A) and at 20-40 cm deep (B) of *P. maximum* at 30  
296 days after treatments. Treatments: aTaCO<sub>2</sub> (ambient temperature and ambient [CO<sub>2</sub>]),  
297 eTaCO<sub>2</sub> (2°C above ambient temperature and ambient [CO<sub>2</sub>]), aTeCO<sub>2</sub> (ambient  
298 temperature and 200 ppm above ambient [CO<sub>2</sub>]), and eTeCO<sub>2</sub> (2°C above ambient  
299 temperature and 200 ppm above ambient [CO<sub>2</sub>]). Bars show means and SE of four  
300 replicates. <sup>ns</sup> and <sup>\*\*</sup>: not significant and significant at 1%, respectively.

301

## 302 **Discussion**

303 Our main hypothesis was not corroborated because the nutrient content, accumulation  
304 and NUE responses to eCO<sub>2</sub> and eT were variable for each nutrient. However, we

305 highlight two major trends observed in our study: i) eT under aCO<sub>2</sub> promoted an enhanced  
306 nutrient accumulation and NUE for most of the nutrients studied and, ii) eCO<sub>2</sub> had an  
307 interactive effect when combined with eT, decreasing the NUE of N, K and Ca. In  
308 previous experiments conducted during winter (10–30°C) with adequate water  
309 availability, warming combined or not with elevated [CO<sub>2</sub>] resulted in a higher leaf dry  
310 mass of *P. maximum*. In addition, the authors observed increased N content in elevated  
311 [CO<sub>2</sub>] combined or not with warming, and decreased N content due to warming alone  
312 [11]. Here, we find that during summer (16–35°C), shoot dry mass also increases under  
313 eT and [eCO<sub>2</sub>], but the N content was not changed in most evaluations. Moreover,  
314 considering the final re-growth phase, which would be the period when the cattle would  
315 eat the pasture [21], K, Mg and S were not affected by treatments.

316         The increased NUE of N under warmed plots with unchanged N content indicated  
317 that *P. maximum* acclimates to moderate heating. This response may be associated with  
318 changes in N uptake and assimilation, allocation and remobilisation or metabolic  
319 modifications [28]. Increased NUE of N may also be achieved by higher transpiration  
320 rates. However, recent evidence indicated that a 2°C elevation does not affect  
321 transpiration rates or water use efficiency of guinea grass [6]. In addition, we observed  
322 no dilution effect as the plants grew. Interesting, this improved NUE of N was detected  
323 even under rain-fed conditions, demonstrating that the positive effects of warming  
324 demonstrated by other studies under well-watered conditions on *P. maximum* are  
325 maintained under rain-fed conditions.

326         Typically, plants grown under increased temperature exhibit lower P [29].  
327 Accordingly, in our experiment, the decrease in P content, and its higher accumulation  
328 under eT, suggest that the dry mass of plants increased with warming and [eCO<sub>2</sub>] and that  
329 the P decrease was not limiting for plant growth. In addition, the P use efficiency indicates

330 that the decrease of P content with warming was not harmful to plants. However, the P  
331 dilution effect that occurred with increasing plant dry mass does not seem to have been  
332 influenced by the [CO<sub>2</sub>] and warming treatments, given the similar slope values of the  
333 lines (Fig 4B). However, the increase in photosynthetic rate under elevated [CO<sub>2</sub>] [6] can  
334 be associated with the Rubisco content. High [CO<sub>2</sub>] is expected to increase the Rubisco  
335 concentration, and this will require more inorganic P to be transformed into organic P for  
336 Rubisco synthesis, which is an important component of rRNA involved in enzyme  
337 synthesis. Thus, the P use efficiency would increase because a higher proportion of P in  
338 plant tissue is used for photosynthesis-associated metabolism and assimilation [30], as  
339 we observed here.

340 In the literature, it is indicated that warming decreased K content in several plant  
341 species, although the causes are still unknown [31]. In our experiment, the K content was  
342 lower as a result of the temperature increase in the first three evaluations and, in the last  
343 one, there was no difference from the other treatments (Fig 1C). Although the K content  
344 was lower in the first three evaluations due to eT effects, plants showed increased NUE  
345 of K (Fig 3C), which presumably contributed to the gain in dry mass.

346 The increased Ca accumulation under eT, mainly in the last evaluations (Fig 2D),  
347 was probably associated with the increased Ca content (Fig 1D) and the increased shoot  
348 dry mass (Fig 5), and also due to no dilution effect (Fig 4D). Moreover, the increased Ca  
349 use efficiency (Fig 3D) under this same condition suggests that the gain in dry mass was  
350 greater than the increase in its absorption. The increase of Ca accumulation under eT may  
351 also be associated with the increased of root dry mass in this same treatment because root  
352 interception significantly contributes to Ca uptake [7].

353 The values close to the Mg and S contents suggest that the changes in the  
354 accumulation and the efficiency of these nutrients occurred due to the differences

355 observed in the shoot dry mass and also the fact that although Mg concentrates and S  
356 dilutes with increased in shoot dry mass, this does not appear to be influenced by [CO<sub>2</sub>]  
357 and warming treatments, due to the similar straight slope (Fig 4E and 4F).

358         After a long time, the response of C<sub>4</sub> species to increased levels of [CO<sub>2</sub>] was  
359 considered inexistent due to the natural concentration mechanisms of CO<sub>2</sub> inside the  
360 bundle sheath cells. However, there is variation in the [CO<sub>2</sub>] saturation level of C<sub>4</sub> leaves.  
361 While some species appear to be saturated under actual [CO<sub>2</sub>], others are not necessarily  
362 saturated at this level [32]. Likewise, *P. maximum* exhibited an increase in photosynthesis  
363 as a function of [eCO<sub>2</sub>] [6] and an increase in dry mass, although this result was dependent  
364 on the time of evaluation, in our experiment. The increase in shoot dry mass with heating  
365 is probably associated with higher efficiency of N, P, K, Ca and Mg use under this same  
366 condition (Fig 3). It means that with warming, plants are better able to convert these  
367 nutrients into dry mass.

368         Finally, because the combination of increased [CO<sub>2</sub>] and rising temperatures occur  
369 simultaneously [3], our short-term combined treatment results suggest that plants will  
370 have decreased P content and increased Ca content. This information may contribute to  
371 the interpretation of nutritional diagnoses in the future. Moreover, the increased  
372 accumulation of N, Ca and S in the combined treatment, without a corresponding increase  
373 in the use efficiency of these same nutrients, indicates that the fertiliser dose may need to  
374 be increased in the climate change scenario. Among these macronutrients, decreased  
375 efficiency of N use has been reported for other grasses [33].

376

## 377 **Conclusion**



378 Our short-term results suggest that under the combination of [eCO<sub>2</sub>] and eT conditions,  
379 *P. maximum* productivity will increase and the nutritional requirement for N, Ca and S  
380 will also increase.

381

## 382 **Acknowledgements**

383 We thank Bruce Kimball from the USDA and Franco Miglietta from IBIMET,  
384 Italy. The authors thank Wolf Seeds from Ribeirão Preto, São Paulo State, Brazil, for  
385 providing seeds of *P. maximum*.

386

## 387 **References**

- 388 1. Houghton RA, Lawrence KT, Hackler JL, Brown S. The spatial distribution of  
389 forest biomass in the Brazilian Amazon: a comparison of estimates. *Glob Chang*  
390 *Biol.* 2008;7: 731–746.
- 391 2. Kumari M, Verma SC, Shweta. Climate change and vegetable crops cultivation:  
392 A review. *Indian J Agric Sci.* 2018;88: 167–174.
- 393 3. Allen MR, Dube OP, Solecki W, Aragón-Durand F, Cramer W. Framing and  
394 context. In: Masson-Delmotte V, Zhai P, Pörtner HO, Roberts D, Skea J, Shukla  
395 PR, et al., editors. *Global Warming of 15°C An IPCC Special Report on the*  
396 *impacts of global warming of 15°C above pre-industrial levels and related global*  
397 *greenhouse gas emission pathways, in the context of strengthening the global*  
398 *response to the threat of climate change.* 2018.
- 399 4. Pezzopane JRM, Santos PM, Evangelista SRM, Bosi C, Cavalcante ACR, Bettiol  
400 GM, et al. *Panicum maximum* cv. Tanzânia: climate trends and regional pasture  
401 production in Brazil. *Grass Forage Sci.* 2017;72: 104–117.

- 402 5. Brouder SM, Volenec JJ. Impact of climate change on crop nutrient and water use  
403 efficiencies. *Physiol Plant*. 2008;133: 705–724.
- 404 6. Habermann E, San Martin JAB, Contin DR, Bossan VP, Barboza A, Braga MR,  
405 et al. Increasing atmospheric CO<sub>2</sub> and canopy temperature induces anatomical and  
406 physiological changes in leaves of the C<sub>4</sub> forage species *Panicum maximum*.  
407 *PLoS One*. 2019;14: e0212506.
- 408 7. Prado RM. *Nutrição de plantas*. 1<sup>st</sup> ed. Jaboticabal: UNESP; 2008.
- 409 8. Houshmandfar A, Fitzgerald GJ, O’Leary G, Tausz-Posch S, Fletcher A, Tausz  
410 M. The relationship between transpiration and nutrient uptake in wheat changes  
411 under elevated atmospheric CO<sub>2</sub>. *Physiol Plant*. 2018;163: 516–529.
- 412 9. Siddiqi MY, Glass ADM. Utilization index: A modified approach to the  
413 estimation and comparison of nutrient utilization efficiency in plants. *J Plant Nutr*.  
414 1981;4: 289–302.
- 415 10. Nie M, Lu M, Bell J, Raut S, Pendall E. Altered root traits due to elevated CO<sub>2</sub>: a  
416 meta-analysis. *Glob Ecol Biogeogr*. 2013;22: 1095–1105.
- 417 11. Prado CHBA, Camargo-Bortolin LHG, Castro É, Martinez CA. Leaf Dynamics  
418 of *Panicum maximum* under Future Climatic Changes. *PLoS One*. 2016;11:  
419 e0149620.
- 420 12. Borjas-Ventura R, Alves LR, de Oliveira R, Martínez CA, Gratão PL. Impacts of  
421 warming and water deficit on antioxidant responses in *Panicum maximum* Jacq.  
422 *Physiol Plant*. 2019;165: 413–426.
- 423 13. Habermann E, Oliveira EAD, Contin DR, Delvecchio G, Viciedo DO, Moraes  
424 MA, et al. Warming and water deficit impact leaf photosynthesis and decrease  
425 forage quality and digestibility of a C<sub>4</sub> tropical grass. *Physiol Plant*. 2019;165:  
426 383–402.

- 427 14. Wedow JM, Yendrek CR, Mello TR, Creste S, Martinez CA, Ainsworth EA.  
428 Metabolite and transcript profiling of Guinea grass (*Panicum maximum* Jacq)  
429 response to elevated [CO<sub>2</sub>] and temperature. *Metabolomics*. 2019;15: 1–13.
- 430 15. St.Clair SB, Lynch JP. The opening of Pandora’s Box: climate change impacts on  
431 soil fertility and crop nutrition in developing countries. *Plant Soil*. 2010;335: 101–  
432 115.
- 433 16. Thornthwaite CW. An Approach toward a Rational Classification of Climate.  
434 *Geogr Rev*. 1948;38: 55-94.
- 435 17. Santos HG. Sistema brasileiro de classificação de solos. Brasília: Embrapa; 2013.
- 436 18. van Raij B, Quaggio JA. Métodos de análises de solos para fins de fertilidade.  
437 Campinas; 1997.
- 438 19. Werner JC, Paulino VT, Cantarella H, Andrade NO, Quaggio JA. Forrageiras. In:  
439 van Raij B, Cantarella H, Quaggio JA, Furlani AMC, editors. Recomendações de  
440 adubação e calagem para o Estado de São Paulo. 1997. p. 289.
- 441 20. Silva S, Sbrissia A, Pereira L. Ecophysiology of C4 Forage Grasses:  
442 Understanding Plant Growth for Optimising Their Use and Management.  
443 *Agriculture*. 2015;5: 598–625.
- 444 21. Corrêa LDA, Santos PM. Manejo e utilização de plantas forrageiras dos gêneros  
445 *Panicum*, *Brachiaria* e *Cynodon*. *Embrapa Pecuária Sudeste Doc 34*. 2003: 36.
- 446 22. Carnevalli RA, Da Silva SC, Bueno AAO, Uebele MC, Bueno FO, Hodgson J, et  
447 al. Herbage production and grazing losses in *Panicum maximum* cv. Mombaça  
448 under four grazing managements. *Trop Grasslands*. 2006;40: 165–176.
- 449 23. Miglietta F, Peressotti A, Vaccari FP, Zaldei A, DeAngelis P, Scarascia-  
450 Mugnozza G. Free-air CO<sub>2</sub> enrichment (FACE) of a poplar plantation: the  
451 POPFACE fumigation system. *New Phytol*. 2001;150: 465–476.

- 452 24. Miglietta F, Hoosbeek MR, Foot J, Gigon F, Hassinen A, Heijmans M, et al.  
453 Spatial and temporal performance of the miniFACE (free air CO<sub>2</sub> enrichment)  
454 system on bog ecosystems in Northern and Central Europe. *Environ Monit*  
455 *Assess.* 2001;66: 107–127.
- 456 25. Kimball BA, Conley MM, Lewin KF. Performance and energy costs associated  
457 with scaling infrared heater arrays for warming field plots from 1 to 100 m. *Theor*  
458 *Appl Climatol.* 2012;108: 247–265.
- 459 26. Bataglia OC, Furlani AMC, Teixeira JAF, Furlani PR, Gallo JR. Métodos de  
460 análise química de plantas. Instituto Agronômico de Campinas. 1983: 46.
- 461 27. Ferreira DF. Sisvar: a computer statistical analysis system. *Ciênc Agrotec.*  
462 2011;35: 1039–1042.
- 463 28. Perchlik M, Tegeder M. Improving Plant Nitrogen Use Efficiency through  
464 Alteration of Amino Acid Transport Processes. *Plant Physiol.* 2017;175: 235–  
465 247.
- 466 29. Reich PB, Oleksyn J. Global patterns of plant leaf N and P in relation to  
467 temperature and latitude. *Proc Natl Acad Sci.* 2004;101: 11001–11006.
- 468 30. Jin J, Tang C, Sale P. The impact of elevated carbon dioxide on the phosphorus  
469 nutrition of plants: a review. *Ann Bot.* 2015;116: 987–999.
- 470 31. Meng T-T, Wang H, Harrison SP, Prentice IC, Ni J, Wang G. Responses of leaf  
471 traits to climatic gradients: adaptive variation versus compositional shifts.  
472 *Biogeosciences.* 2015;12: 5339–5352.
- 473 32. Ainsworth EA, Long SP. What have we learned from 15 years of free-air CO<sub>2</sub>  
474 enrichment (FACE)? A meta-analytic review of the responses of photosynthesis,  
475 canopy properties and plant production to rising CO<sub>2</sub>. *New Phytol.* 2005;165:  
476 351–372.

477 33. Liang S, Li Y, Zhang X, Sun Z, Sun N, Duan Y, et al. Response of crop yield and  
478 nitrogen use efficiency for wheat-maize cropping system to future climate change  
479 in northern China. *Agric For Meteorol.* 2018;262: 310–321.

480

## 481 **Supporting information**

482 **Supplementary material 1 (S1).** ANOVA results of macronutrient content,  
483 macronutrient accumulation, macronutrient use efficiency, linear regressions, dry mass  
484 and all data underlying the findings.

485

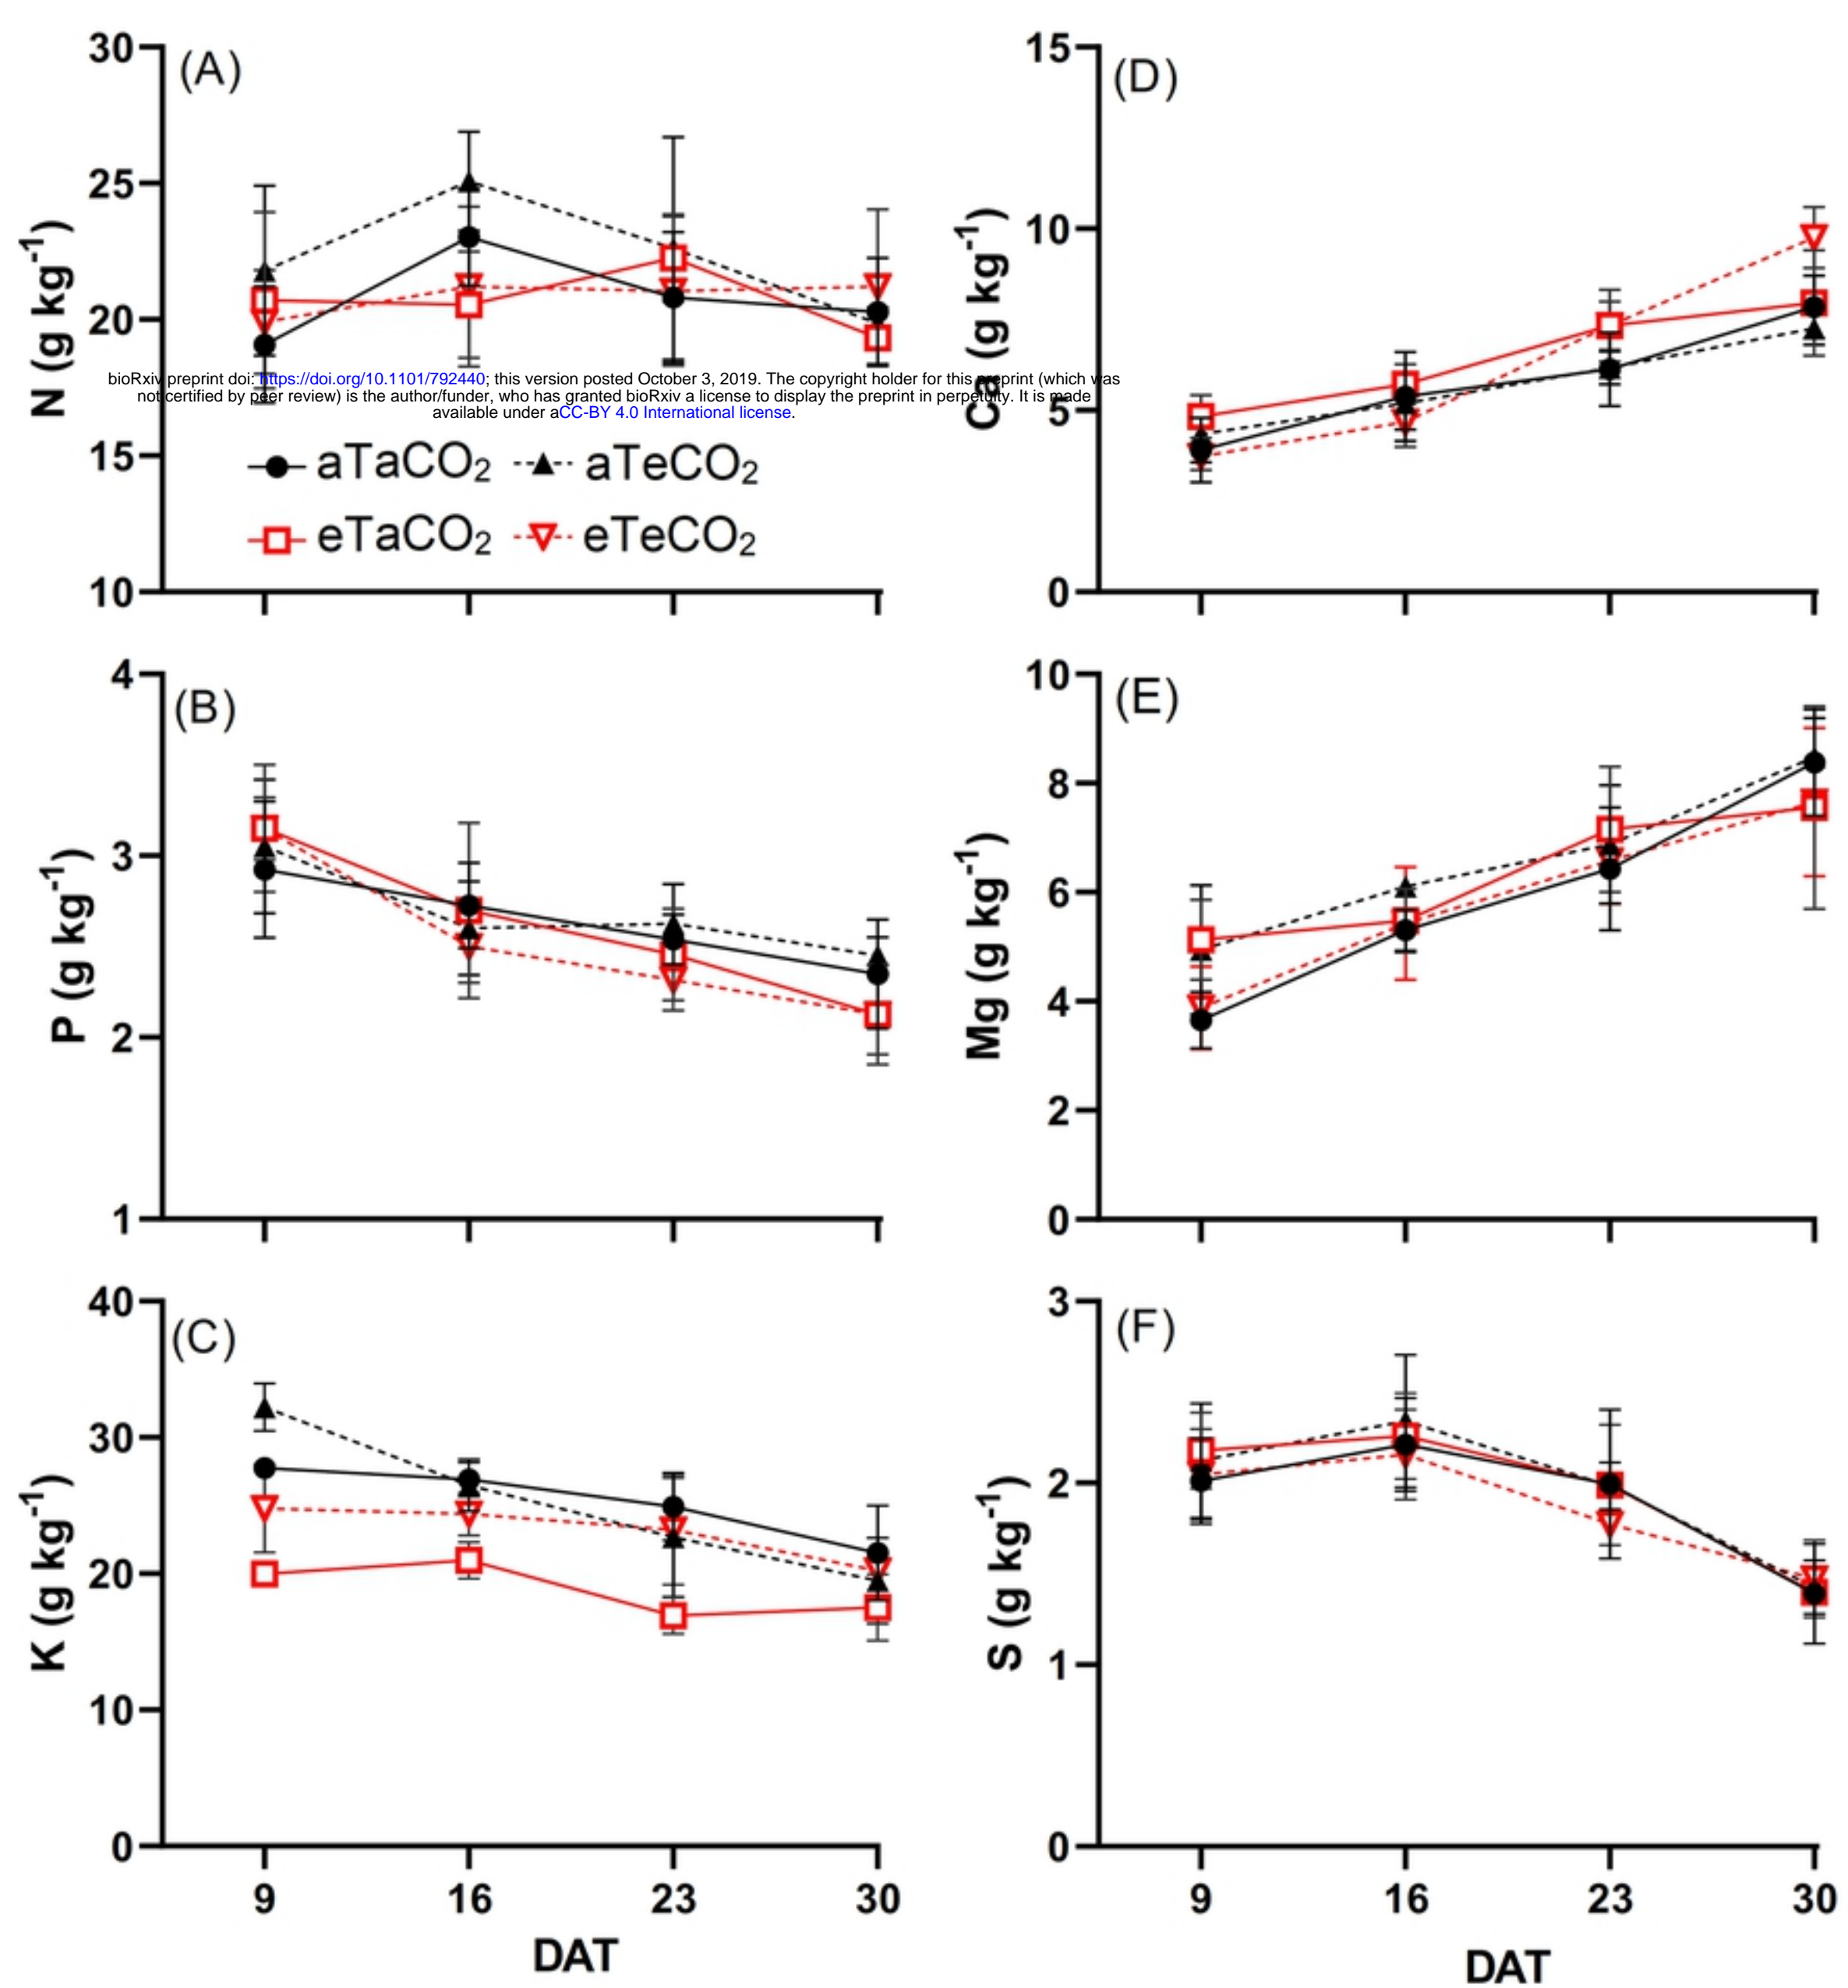

Fig 1

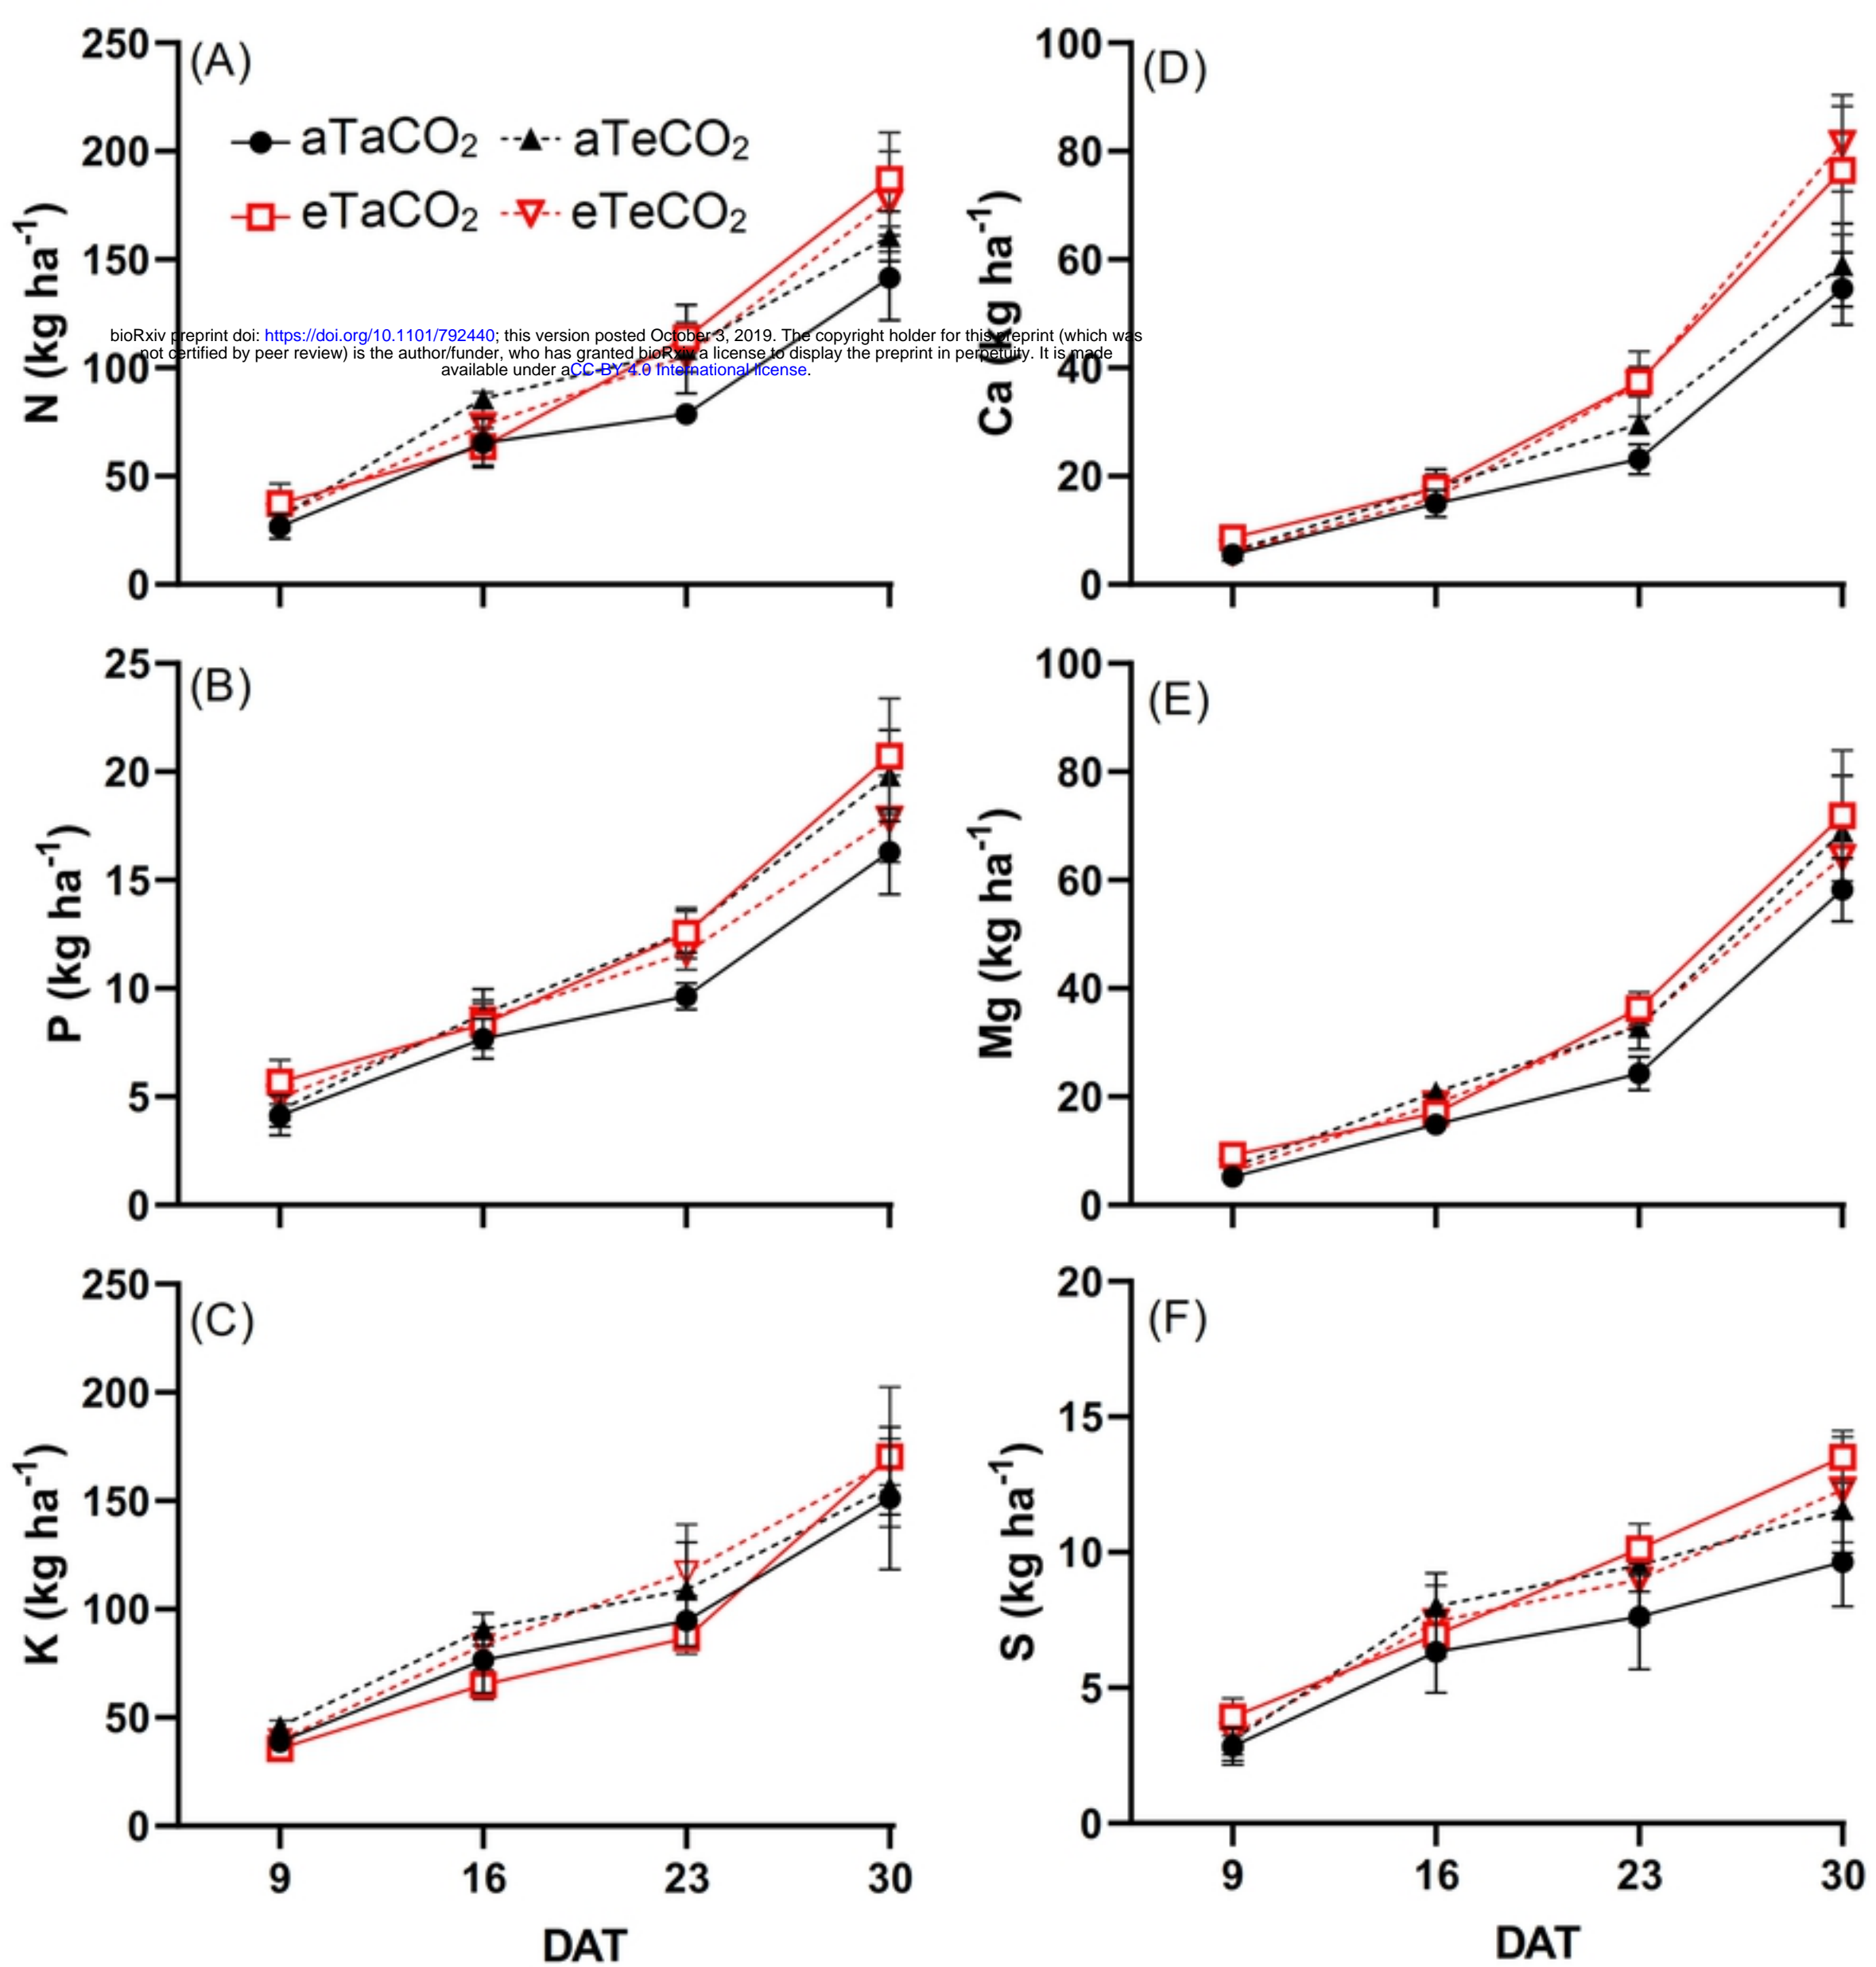

Fig 2

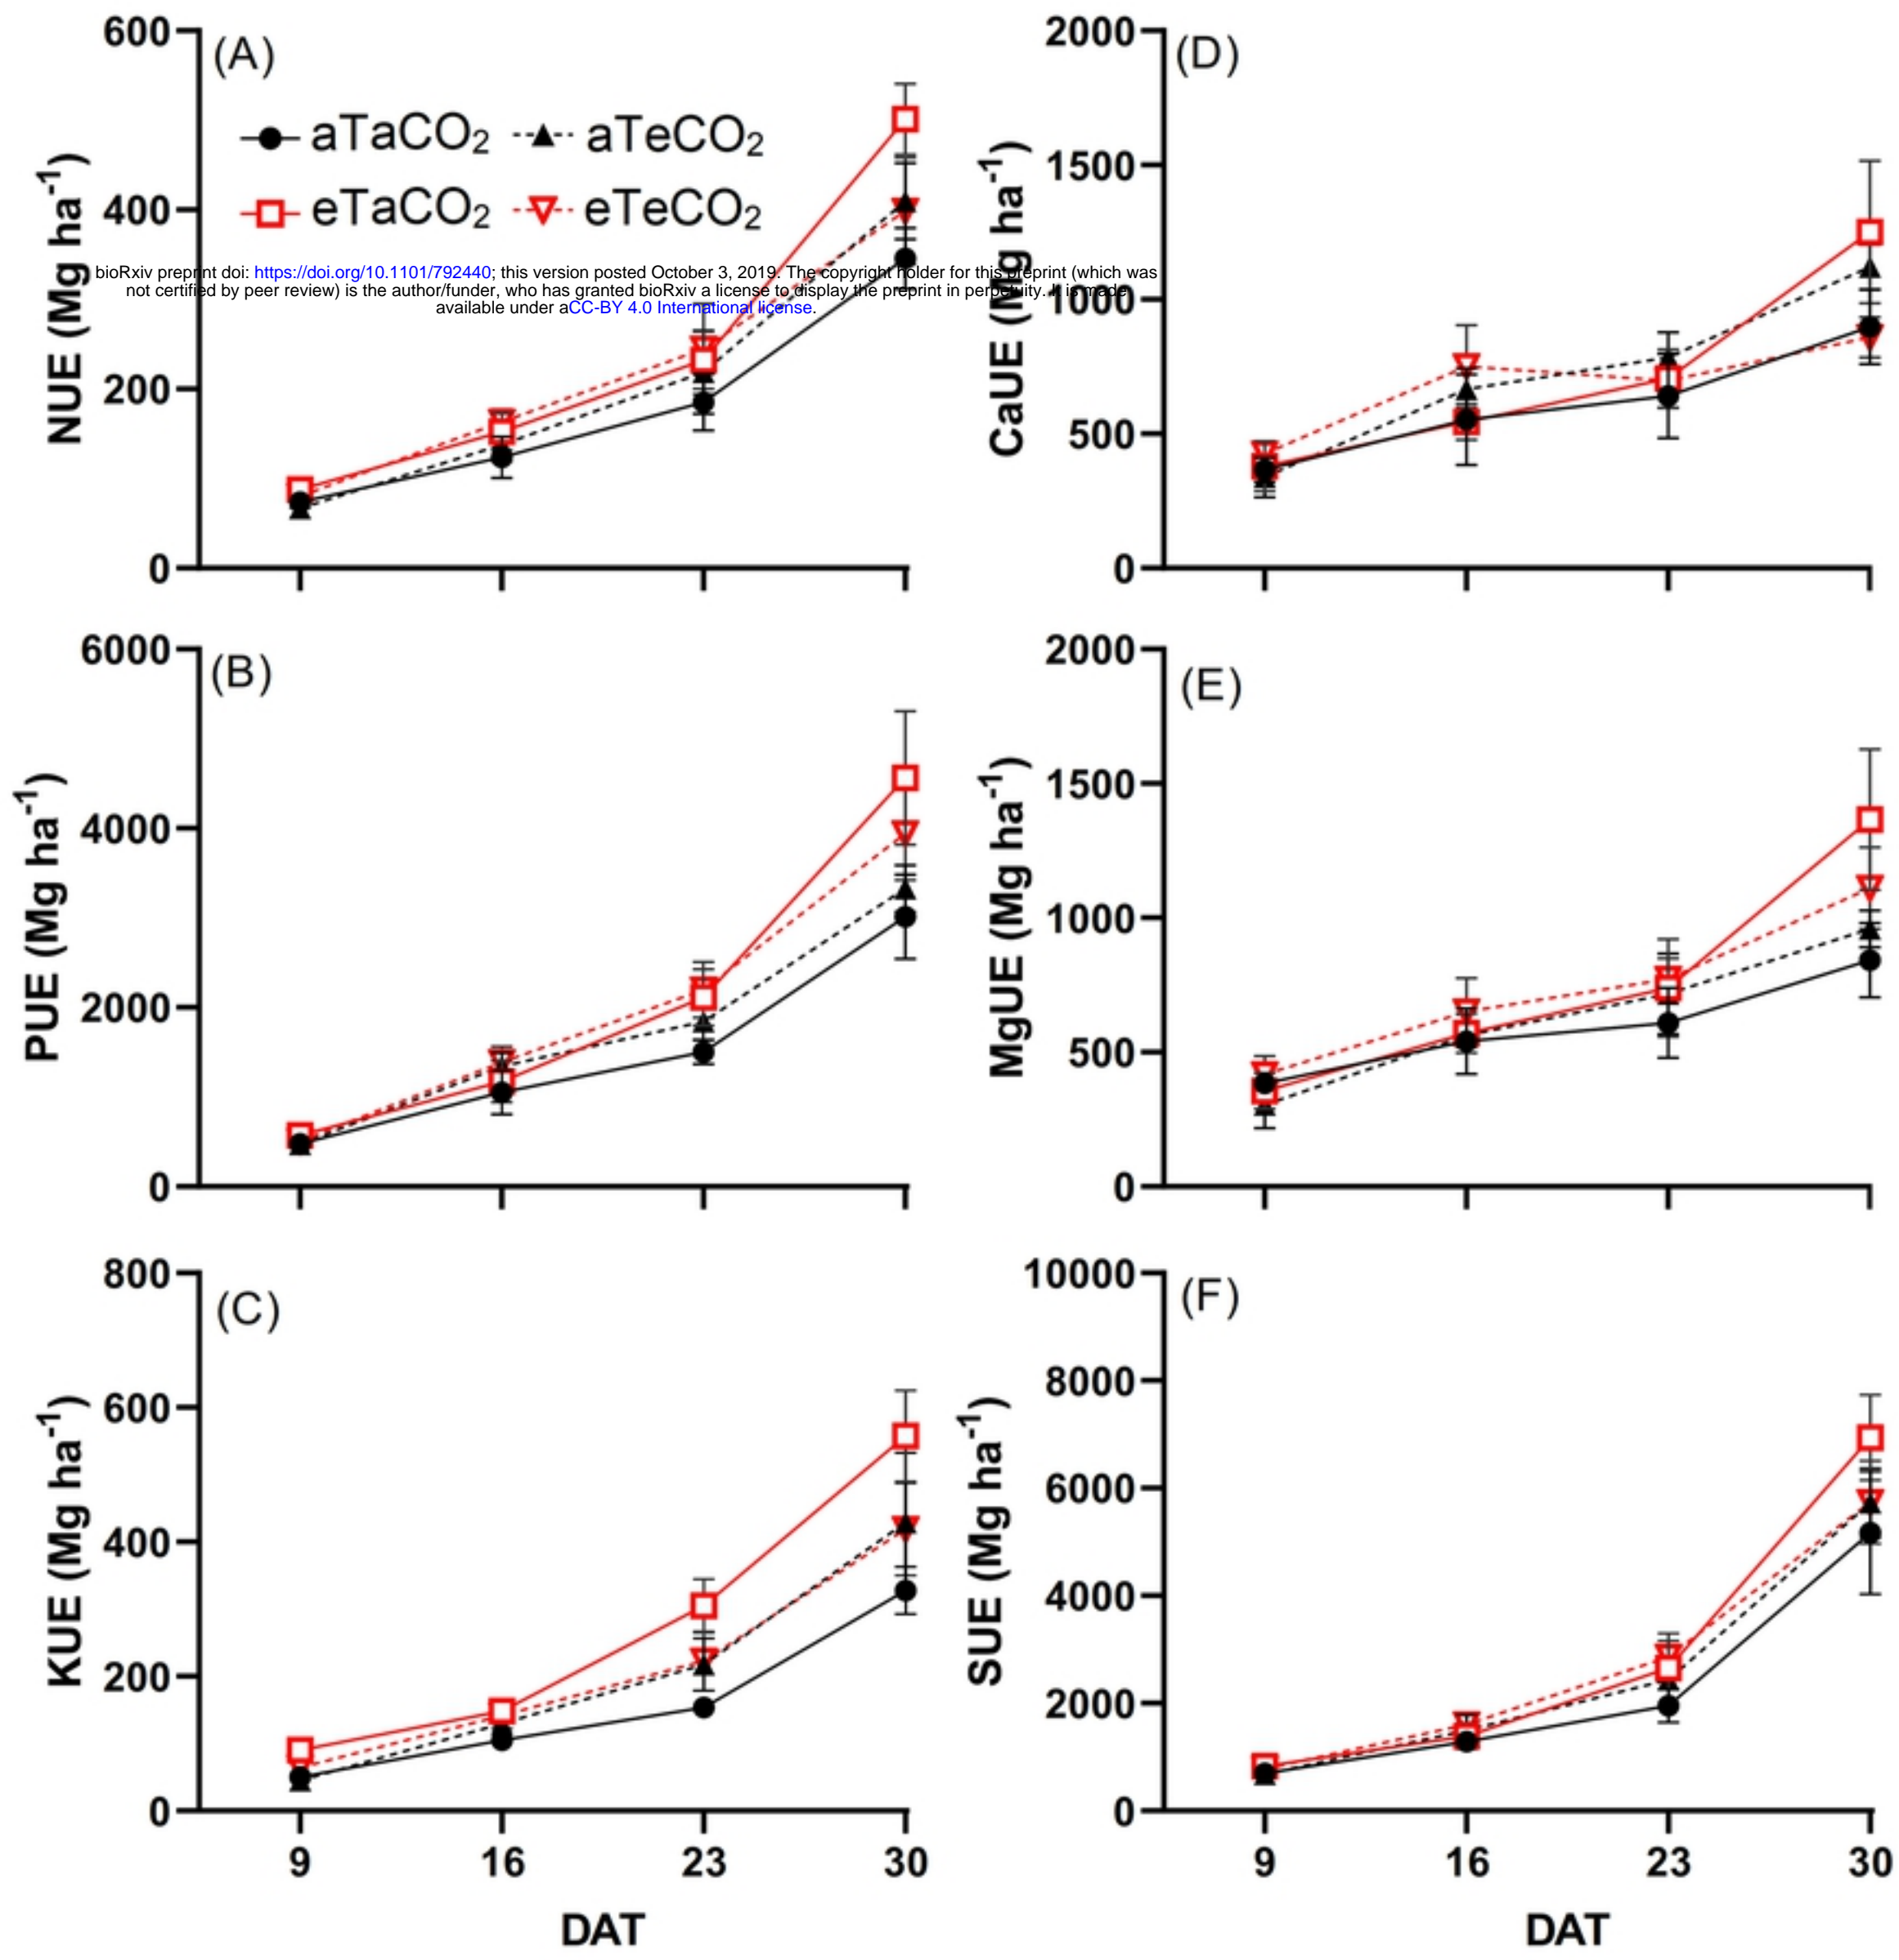

Fig 3



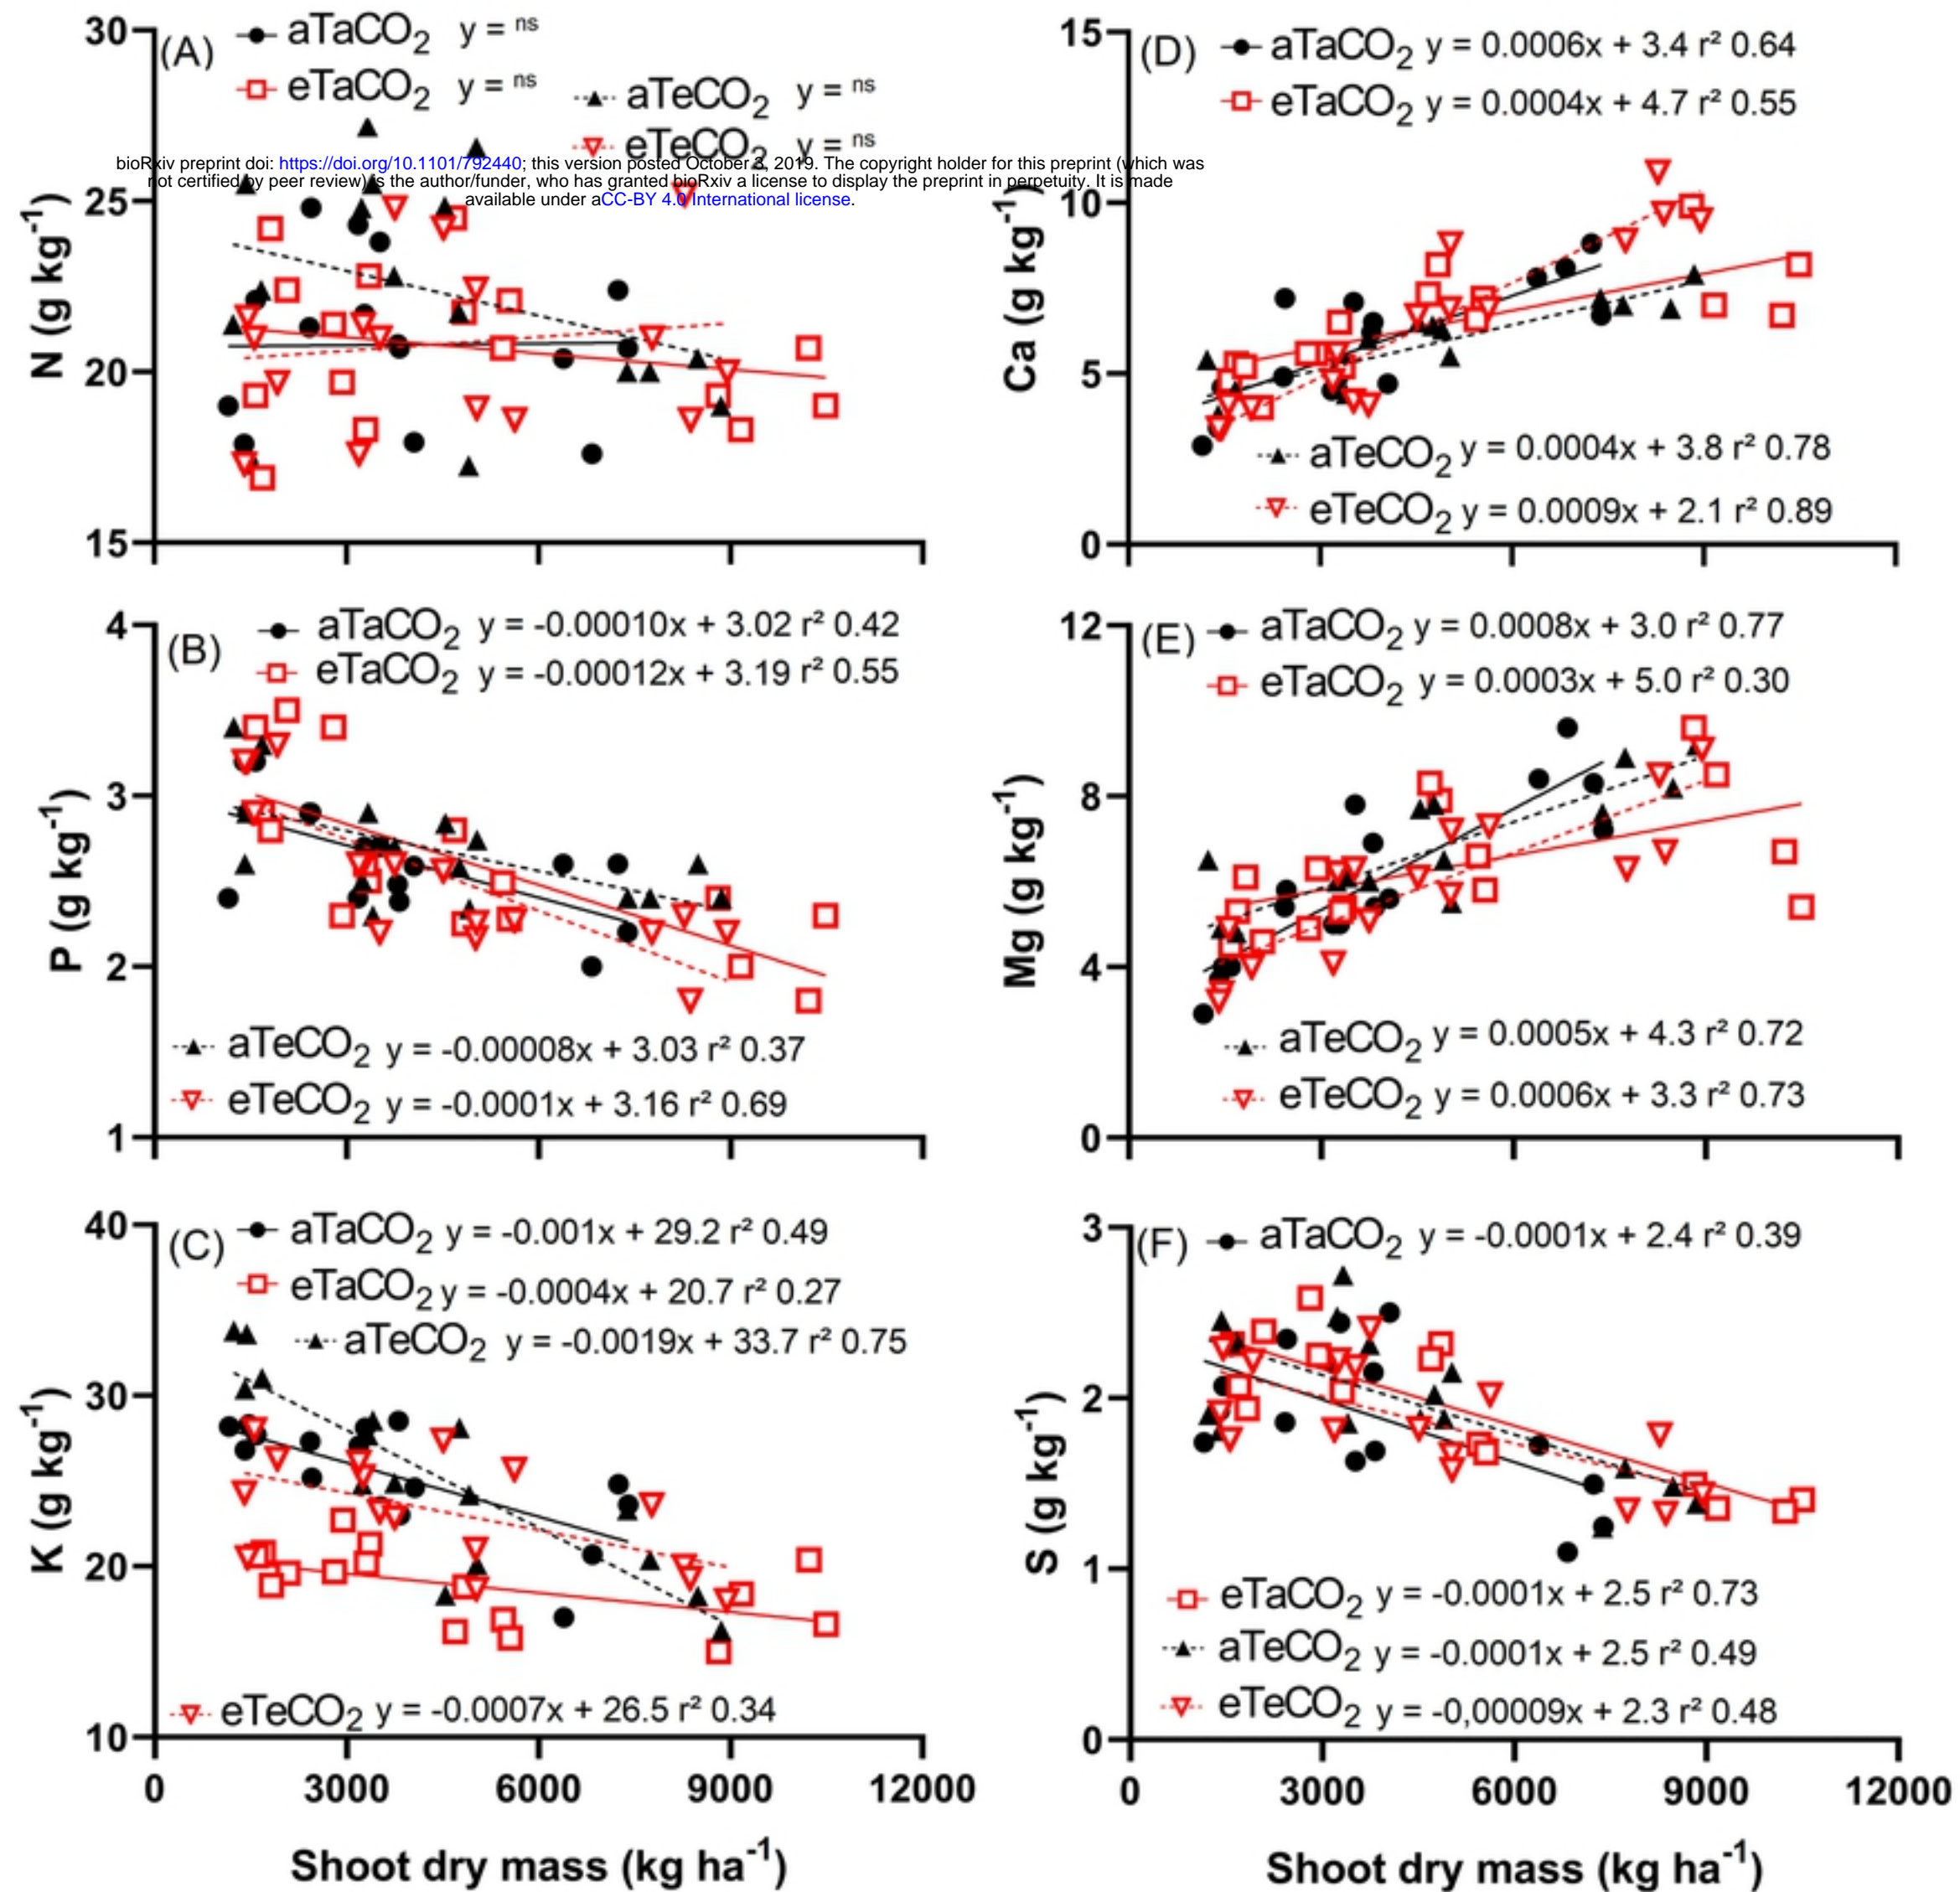

Fig 4

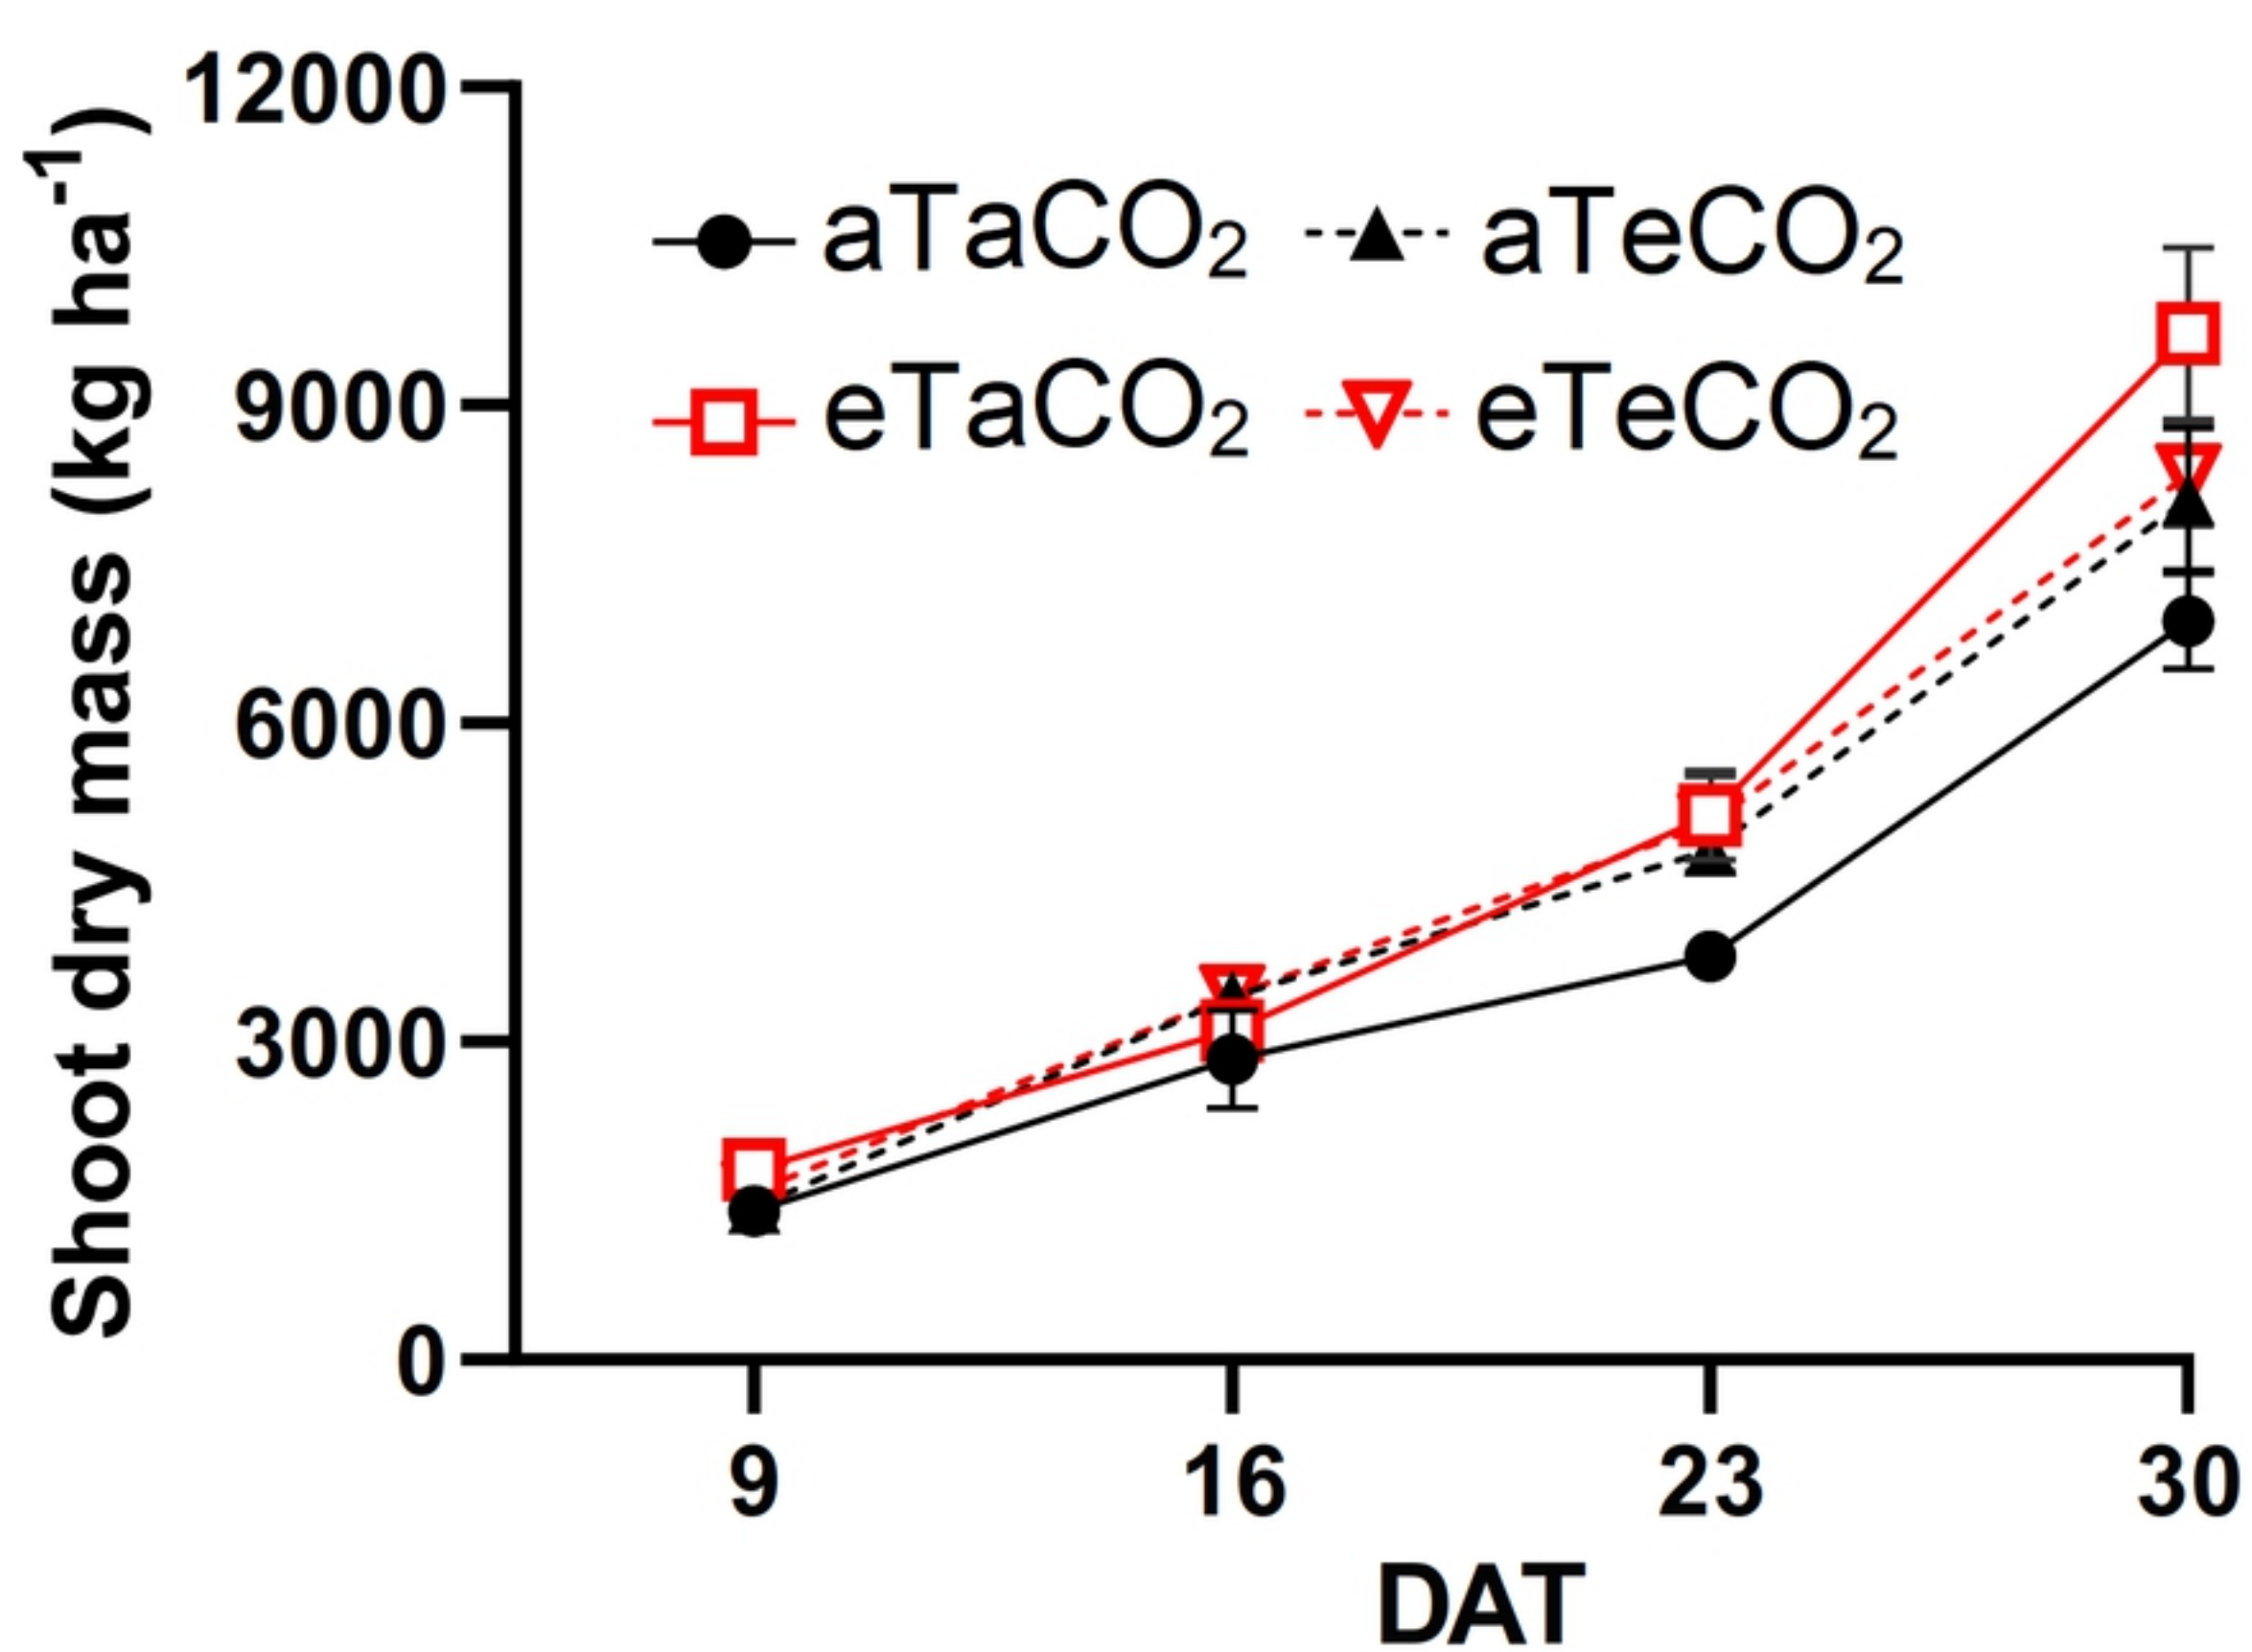

Fig 5

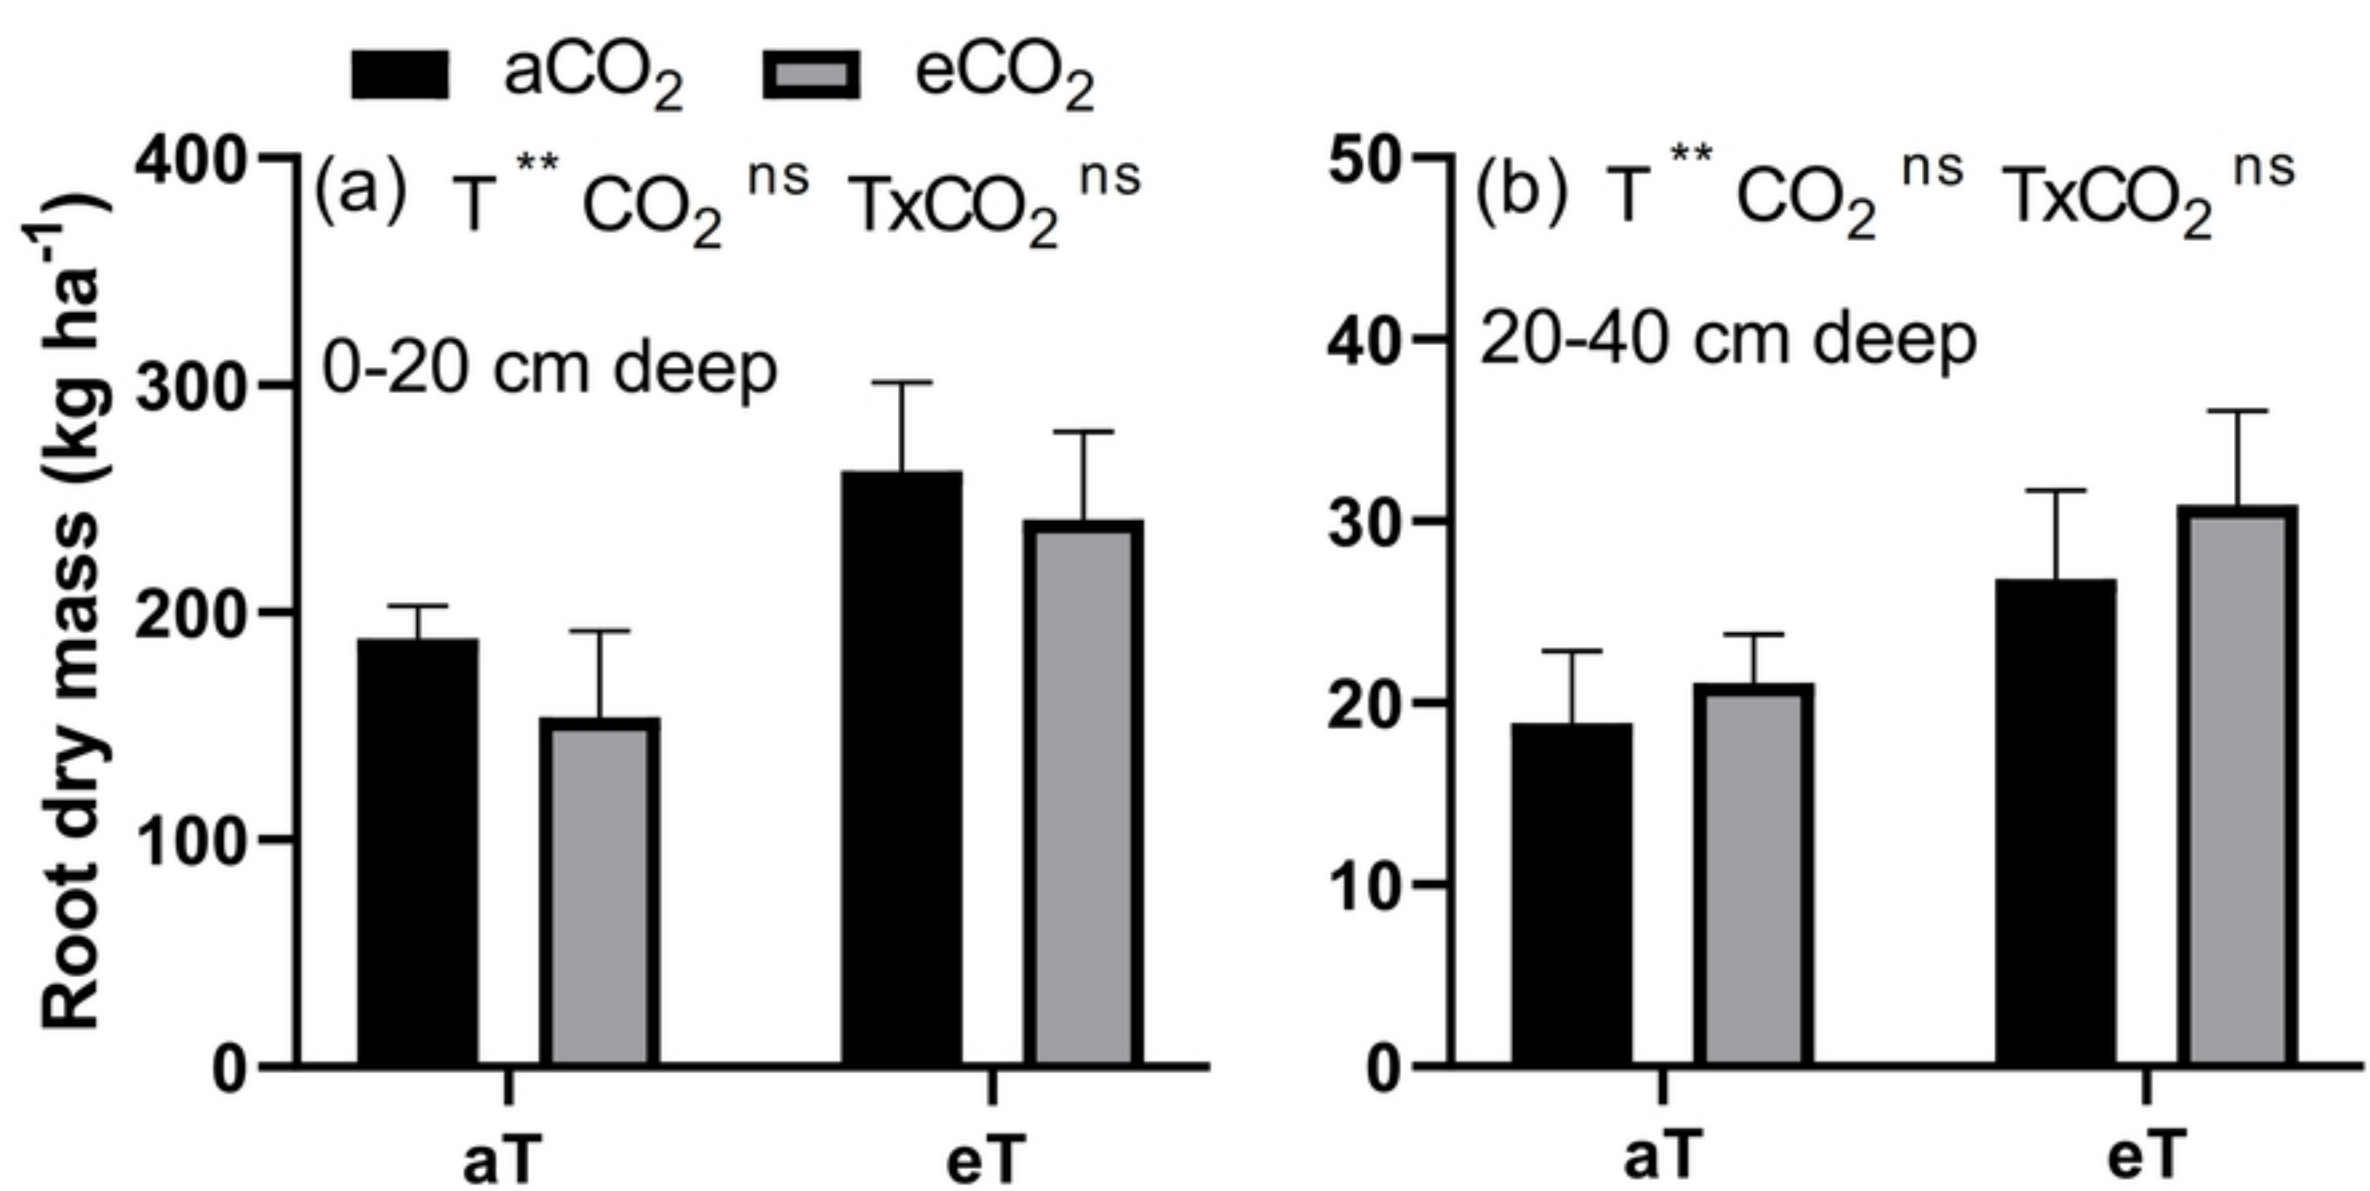

Fig 6
